# Supplementary material
Source: PubMed Central journal article supplement (PMC6825821)
Supplement: nxz144_supplemental_file.pdf [file nxz144_supplemental_file.pdf]

*Supplementary Data*

**Supplemental Table 1.** CIR and NIR of sequential hair segments from Community A ( $n = 12$ )

| Sample ID | Segment (cm) | $\delta^{13}\text{C}$ (‰ VPDB) | $\delta^{15}\text{N}$ (‰ AIR) | % C  | % N  | C/N |
|-----------|--------------|--------------------------------|-------------------------------|------|------|-----|
| A1        | 1            | -16.4                          | 11.7                          | 48.3 | 16.3 | 3.5 |
|           | 2            | -16.6                          | 12.4                          | 47.9 | 16.3 | 3.4 |
|           | 3            | -16.5                          | 13.0                          | 47.6 | 16.3 | 3.4 |
|           | 4            | -16.7                          | 12.7                          | 47.7 | 16.2 | 3.4 |
|           | 5            | -16.7                          | 12.4                          | 47.1 | 16.0 | 3.4 |
|           | 6            | -16.8                          | 12.6                          | 48.3 | 16.3 | 3.5 |
|           | 7            | -16.7                          | 11.7                          | 48.5 | 16.5 | 3.4 |
|           | 8            | -17.8                          | 14.4                          | 44.9 | 15.1 | 3.5 |
|           | 9            | -16.4                          | 11.2                          | 51.9 | 17.4 | 3.5 |
|           | 10           | -16.6                          | 11.2                          | 48.6 | 16.2 | 3.5 |
|           | 11           | -17.0                          | 11.5                          | 51.0 | 16.4 | 3.6 |
|           | 12           | -16.5                          | 11.3                          | 47.9 | 16.0 | 3.5 |
|           | 13           | -16.4                          | 11.3                          | 48.7 | 16.3 | 3.5 |
|           | 14           | -16.7                          | 11.4                          | 49.3 | 16.3 | 3.5 |
|           | 15           | -16.6                          | 11.8                          | 48.0 | 16.1 | 3.5 |
|           | 16           | -16.7                          | 12.1                          | 48.0 | 16.1 | 3.5 |
|           | 17           | -17.1                          | 11.6                          | 48.6 | 15.8 | 3.6 |
| A2        | 1            | -16.1                          | 10.6                          | 47.5 | 16.0 | 3.5 |
|           | 2            | -16.1                          | 11.3                          | 47.2 | 15.8 | 3.5 |
|           | 3            | -16.5                          | 11.2                          | 47.4 | 15.8 | 3.5 |
|           | 4            | -16.3                          | 12.1                          | 47.5 | 16.0 | 3.5 |
|           | 5            | -16.3                          | 10.7                          | 47.3 | 15.9 | 3.5 |
|           | 6            | -16.5                          | 10.6                          | 47.8 | 16.1 | 3.5 |
|           | 7            | -16.7                          | 10.8                          | 48.8 | 16.4 | 3.5 |
| A3        | 1            | -16.7                          | 11.1                          | 46.5 | 15.9 | 3.4 |

*Supplementary Data*

|    |    |       |      |      |      |     |
|----|----|-------|------|------|------|-----|
|    | 2  | -16.4 | 11.7 | 43.0 | 14.5 | 3.5 |
|    | 3  | -16.1 | 11.6 | 46.8 | 15.8 | 3.5 |
|    | 4  | -16.3 | 11.7 | 46.7 | 15.8 | 3.5 |
|    | 5  | -16.4 | 11.4 | 46.9 | 15.8 | 3.5 |
|    | 6  | -16.7 | 11.3 | 47.4 | 15.6 | 3.5 |
|    | 7  | -16.3 | 11.6 | 46.9 | 15.5 | 3.5 |
|    | 8  | -16.0 | 11.4 | 47.0 | 15.7 | 3.5 |
| A4 | 1  | -18.0 | 10.5 | 46.5 | 15.8 | 3.4 |
|    | 2  | -17.8 | 10.1 | 46.4 | 15.9 | 3.4 |
|    | 3  | -18.3 | 10.4 | 50.1 | 16.2 | 3.6 |
|    | 4  | -18.1 | 10.2 | 49.8 | 16.1 | 3.6 |
|    | 5  | -18.3 | 10.5 | 47.6 | 15.4 | 3.6 |
|    | 6  | -18.1 | 10.9 | 48.2 | 16.0 | 3.5 |
|    | 7  | -18.1 | 10.8 | 46.4 | 15.5 | 3.5 |
| A5 | 1  | -16.2 | 10.5 | 48.4 | 16.0 | 3.5 |
|    | 2  | -16.7 | 11.1 | 47.5 | 15.9 | 3.5 |
|    | 3  | -16.8 | 11.2 | 46.1 | 15.7 | 3.4 |
|    | 4  | -16.5 | 10.2 | 46.7 | 16.0 | 3.4 |
|    | 5  | -16.9 | 10.2 | 61.0 | 19.7 | 3.6 |
|    | 6  | -16.6 | 10.4 | 46.1 | 15.6 | 3.4 |
|    | 7  | -17.0 | 10.9 | 45.3 | 15.5 | 3.4 |
|    | 8  | -16.8 | 11.5 | 45.5 | 15.6 | 3.4 |
|    | 9  | -16.3 | 11.5 | 47.0 | 16.0 | 3.4 |
|    | 10 | -16.4 | 12.2 | 46.2 | 15.3 | 3.5 |
|    | 11 | -16.7 | 11.9 | 47.4 | 15.9 | 3.5 |
|    | 12 | -16.9 | 11.4 | 47.5 | 15.5 | 3.6 |

*Supplementary Data*

|    |    |       |      |      |      |     |
|----|----|-------|------|------|------|-----|
|    | 13 | -16.6 | 10.9 | 47.0 | 15.8 | 3.5 |
|    | 14 | -16.8 | 10.6 | 47.5 | 15.9 | 3.5 |
|    | 15 | -17.1 | 10.5 | 46.7 | 15.7 | 3.5 |
|    | 16 | -17.2 | 10.5 | 47.6 | 15.8 | 3.5 |
| A6 | 1  | -17.8 | 11.5 | 47.6 | 15.8 | 3.5 |
|    | 2  | -17.9 | 11.4 | 48.3 | 15.8 | 3.6 |
|    | 3  | -18.0 | 11.5 | 47.9 | 16.1 | 3.5 |
|    | 4  | -18.2 | 11.6 | 48.2 | 16.1 | 3.5 |
|    | 5  | -18.2 | 11.6 | 48.9 | 15.8 | 3.6 |
|    | 6  | -18.0 | 11.6 | 47.1 | 15.9 | 3.5 |
|    | 7  | -18.3 | 11.7 | 48.6 | 15.5 | 3.6 |
|    | 8  | -18.2 | 11.9 | 48.5 | 16.1 | 3.5 |
|    | 9  | -17.6 | 12.1 | 48.4 | 16.2 | 3.5 |
|    | 10 | -17.3 | 12.6 | 47.9 | 16.3 | 3.4 |
|    | 11 | -17.2 | 12.3 | 47.0 | 16.1 | 3.4 |
|    | 12 | -17.4 | 11.7 | 47.5 | 16.1 | 3.5 |
|    | 13 | -17.5 | 11.2 | 47.0 | 15.9 | 3.4 |
|    | 14 | -17.6 | 10.9 | 46.7 | 16.1 | 3.4 |
|    | 15 | -17.9 | 10.6 | 47.2 | 15.8 | 3.5 |
|    | 16 | -17.8 | 10.6 | 47.8 | 16.2 | 3.4 |
|    | 17 | -17.8 | 10.6 | 48.3 | 16.2 | 3.5 |
|    | 18 | -17.9 | 11.0 | 48.3 | 16.1 | 3.5 |
|    | 19 | -17.7 | 10.9 | 47.8 | 16.2 | 3.5 |
|    | 20 | -17.9 | 11.4 | 47.7 | 15.9 | 3.5 |
|    | 21 | -17.9 | 11.3 | 48.4 | 16.0 | 3.5 |
|    | 22 | -17.9 | 11.8 | 48.4 | 16.0 | 3.5 |
|    | 23 | -17.8 | 11.5 | 48.6 | 16.3 | 3.5 |

*Supplementary Data*

|    |       |      |      |      |     |
|----|-------|------|------|------|-----|
| 24 | -17.5 | 12.0 | 48.5 | 16.3 | 3.5 |
| 25 | -17.9 | 11.8 | 48.5 | 16.2 | 3.5 |
| 26 | -17.7 | 12.0 | 47.4 | 16.0 | 3.5 |
| 27 | -17.9 | 11.8 | 47.6 | 15.9 | 3.5 |
| 28 | -17.9 | 11.7 | 49.1 | 16.3 | 3.5 |
| 29 | -18.0 | 11.3 | 47.7 | 15.9 | 3.5 |
| 30 | -17.9 | 11.4 | 47.7 | 16.1 | 3.5 |
| 31 | -18.0 | 11.4 | 47.5 | 16.0 | 3.5 |
| 32 | -18.1 | 11.4 | 47.4 | 15.8 | 3.5 |
| 33 | -18.0 | 11.7 | 47.5 | 15.9 | 3.5 |
| 34 | -18.1 | 11.7 | 47.1 | 15.9 | 3.5 |
| 35 | -18.1 | 11.5 | 48.3 | 16.0 | 3.5 |
| 36 | -18.4 | 11.8 | 48.0 | 16.1 | 3.5 |
| 37 | -18.3 | 11.6 | 47.0 | 15.8 | 3.5 |
| 38 | -18.6 | 12.2 | 47.6 | 15.4 | 3.6 |
| 39 | -18.3 | 12.2 | 47.5 | 15.8 | 3.5 |
| 40 | -18.0 | 12.2 | 47.7 | 16.1 | 3.5 |
| 41 | -18.1 | 12.4 | 47.7 | 16.0 | 3.5 |
| 42 | -18.4 | 12.1 | 51.5 | 16.2 | 3.7 |
| 43 | -17.9 | 12.0 | 50.8 | 16.2 | 3.7 |
| 44 | -18.1 | 12.1 | 51.5 | 16.3 | 3.7 |
| 45 | -18.2 | 11.6 | 49.7 | 15.5 | 3.7 |
| 46 | -18.1 | 11.7 | 52.1 | 16.5 | 3.7 |
| 47 | -18.1 | 11.1 | 50.3 | 16.1 | 3.6 |
| 48 | -17.9 | 11.0 | 49.8 | 16.0 | 3.6 |
| 49 | -18.1 | 11.2 | 48.3 | 15.3 | 3.7 |
| 50 | -18.0 | 11.2 | 49.4 | 16.0 | 3.6 |
| 51 | -18.2 | 11.0 | 49.0 | 15.7 | 3.6 |

*Supplementary Data*

|    |    |       |      |      |      |     |
|----|----|-------|------|------|------|-----|
|    | 52 | -18.1 | 11.5 | 45.1 | 14.6 | 3.6 |
|    | 53 | -18.1 | 11.6 | 48.4 | 15.8 | 3.6 |
|    | 54 | -18.2 | 11.7 | 49.8 | 15.7 | 3.7 |
|    | 55 | -18.4 | 11.0 | 49.6 | 15.5 | 3.7 |
|    | 56 | -18.0 | 11.8 | 49.9 | 16.1 | 3.6 |
| A7 | 1  | -17.6 | 13.1 | 46.5 | 16.0 | 3.4 |
|    | 2  | -17.0 | 13.5 | 46.2 | 15.8 | 3.4 |
|    | 3  | -16.9 | 13.8 | 48.3 | 16.1 | 3.5 |
|    | 4  | -16.9 | 14.2 | 46.1 | 15.8 | 3.4 |
|    | 5  | -17.4 | 13.5 | 45.9 | 15.5 | 3.5 |
|    | 6  | -17.4 | 12.7 | 47.0 | 16.0 | 3.4 |
|    | 7  | -17.6 | 12.4 | 47.1 | 15.8 | 3.5 |
|    | 8  | -17.9 | 12.3 | 46.5 | 15.5 | 3.5 |
|    | 9  | -17.9 | 12.1 | 46.8 | 15.5 | 3.5 |
| A8 | 1  | -18.2 | 13.5 | 42.8 | 14.2 | 3.5 |
|    | 2  | -18.3 | 13.6 | 42.9 | 14.3 | 3.5 |
|    | 3  | -18.6 | 13.3 | 44.0 | 14.6 | 3.5 |
|    | 4  | -18.2 | 14.1 | 42.2 | 14.0 | 3.5 |
|    | 5  | -18.2 | 14.4 | 42.7 | 14.3 | 3.5 |
|    | 6  | -18.5 | 14.5 | 43.1 | 14.3 | 3.5 |
|    | 7  | -18.7 | 14.0 | 42.9 | 14.2 | 3.5 |
|    | 8  | -18.5 | 13.9 | 43.0 | 14.3 | 3.5 |
|    | 9  | -18.2 | 14.2 | 42.8 | 14.2 | 3.5 |
|    | 10 | -18.1 | 14.1 | 42.8 | 14.1 | 3.5 |
|    | 11 | -17.9 | 14.0 | 43.2 | 14.3 | 3.5 |
|    | 12 | -18.0 | 13.3 | 42.8 | 14.2 | 3.5 |

*Supplementary Data*

|    |    |       |      |      |      |     |
|----|----|-------|------|------|------|-----|
|    | 13 | -18.5 | 13.0 | 43.9 | 14.5 | 3.5 |
|    | 14 | -18.9 | 12.8 | 43.3 | 14.2 | 3.5 |
|    | 15 | -18.9 | 13.0 | 43.9 | 14.5 | 3.5 |
|    | 16 | -19.1 | 12.9 | 44.1 | 14.5 | 3.6 |
|    | 17 | -18.9 | 12.9 | 44.5 | 14.6 | 3.6 |
|    | 18 | -19.0 | 12.8 | 44.7 | 14.6 | 3.6 |
|    | 19 | -18.9 | 12.8 | 44.7 | 14.6 | 3.6 |
|    | 20 | -18.9 | 12.8 | 46.5 | 15.2 | 3.6 |
|    | 21 | -18.6 | 12.4 | 46.0 | 15.1 | 3.6 |
|    | 22 | -18.6 | 12.6 | 44.0 | 14.3 | 3.6 |
| A9 | 1  | -17.3 | 12.7 | 36.0 | 11.9 | 3.5 |
|    | 2  | -17.5 | 13.0 | 43.1 | 14.2 | 3.5 |
|    | 3  | -17.5 | 13.5 | 43.7 | 14.2 | 3.6 |
|    | 4  | -17.3 | 13.4 | 40.9 | 13.3 | 3.6 |
|    | 5  | -17.7 | 13.0 | 42.8 | 14.0 | 3.6 |
|    | 6  | -17.9 | 12.7 | 43.1 | 14.0 | 3.6 |
|    | 7  | -17.7 | 11.6 | 43.2 | 14.0 | 3.6 |
|    | 8  | -17.9 | 12.0 | 43.3 | 14.0 | 3.6 |
|    | 9  | -18.0 | 12.3 | 43.1 | 14.0 | 3.6 |
|    | 10 | -18.1 | 12.6 | 43.1 | 13.9 | 3.6 |
|    | 11 | -18.1 | 12.1 | 43.1 | 13.9 | 3.6 |
|    | 12 | -18.0 | 12.3 | 43.2 | 13.9 | 3.6 |
|    | 13 | -17.9 | 12.1 | 43.7 | 14.0 | 3.6 |
|    | 14 | -17.8 | 12.0 | 41.5 | 13.6 | 3.6 |
|    | 15 | -18.0 | 12.0 | 42.7 | 13.9 | 3.6 |
|    | 16 | -17.9 | 12.0 | 42.6 | 13.9 | 3.6 |
|    | 17 | -17.9 | 12.0 | 44.1 | 14.3 | 3.6 |

*Supplementary Data*

|     |    |       |      |      |      |     |
|-----|----|-------|------|------|------|-----|
|     | 18 | -17.7 | 12.3 | 44.4 | 14.3 | 3.6 |
|     | 19 | -17.7 | 12.7 | 46.4 | 14.7 | 3.7 |
| A10 | 1  | -19.0 | 11.7 | 53.9 | 16.5 | 3.8 |
|     | 2  | -17.8 | 12.1 | 47.1 | 15.3 | 3.6 |
|     | 3  | -17.7 | 12.9 | 58.0 | 19.0 | 3.6 |
|     | 4  | -17.8 | 13.1 | 48.7 | 16.0 | 3.6 |
|     | 5  | -17.9 | 13.0 | 47.7 | 15.4 | 3.6 |
|     | 6  | -18.2 | 12.5 | 49.5 | 15.5 | 3.7 |
|     | 7  | -18.5 | 12.9 | 49.5 | 15.1 | 3.8 |
|     | 8  | -18.2 | 11.6 | 50.9 | 16.2 | 3.7 |
|     | 9  | -18.3 | 12.0 | 50.2 | 15.8 | 3.7 |
|     | 10 | --    | 12.5 | --   | 14.4 | --  |
|     | 11 | -18.1 | 12.5 | 48.3 | 15.9 | 3.6 |
|     | 12 | -18.1 | 12.8 | 48.3 | 15.9 | 3.5 |
|     | 13 | -18.3 | 12.6 | 48.2 | 15.7 | 3.6 |
|     | 14 | -18.3 | 12.8 | 48.2 | 15.7 | 3.6 |
|     | 15 | -18.3 | 12.6 | 48.3 | 15.3 | 3.7 |
|     | 16 | -18.3 | 12.7 | 48.4 | 15.3 | 3.7 |
|     | 17 | -18.2 | 12.5 | 48.9 | 15.7 | 3.6 |
|     | 18 | -18.5 | 12.3 | 49.1 | 15.1 | 3.8 |
| A11 | 1  | -18.0 | 14.5 | 43.8 | 14.5 | 3.5 |
|     | 2  | -17.8 | 14.7 | 46.7 | 15.7 | 3.5 |
|     | 3  | -17.8 | 14.7 | 44.1 | 14.8 | 3.5 |
|     | 4  | -17.5 | 14.9 | 43.9 | 14.7 | 3.5 |
|     | 5  | -17.6 | 15.2 | 43.6 | 14.6 | 3.5 |
|     | 6  | -17.5 | 15.1 | 44.0 | 14.7 | 3.5 |

*Supplementary Data*

|     |    |       |      |      |      |     |
|-----|----|-------|------|------|------|-----|
|     | 7  | -17.9 | 14.6 | 43.9 | 14.6 | 3.5 |
|     | 8  | -17.9 | 13.8 | 44.2 | 14.8 | 3.5 |
|     | 9  | -17.9 | 13.9 | 43.8 | 14.5 | 3.5 |
|     | 10 | -17.9 | 13.9 | 43.7 | 14.6 | 3.5 |
|     | 11 | -17.8 | 14.6 | 39.7 | 13.2 | 3.5 |
|     | 12 | -17.9 | 14.9 | 43.9 | 14.6 | 3.5 |
|     | 13 | -17.8 | 14.7 | 43.6 | 14.5 | 3.5 |
|     | 14 | -18.0 | 14.4 | 44.0 | 14.5 | 3.5 |
|     | 15 | -17.9 | 14.5 | 43.1 | 14.3 | 3.5 |
|     | 16 | -18.0 | 13.9 | 44.9 | 14.8 | 3.5 |
|     | 17 | -17.8 | 13.9 | 44.1 | 14.6 | 3.5 |
|     | 18 | -17.8 | 14.2 | 44.3 | 14.6 | 3.5 |
|     | 19 | -17.7 | 14.3 | 44.1 | 14.5 | 3.5 |
|     | 20 | -17.9 | 14.1 | 44.2 | 14.4 | 3.6 |
|     | 21 | -17.8 | 13.9 | 44.8 | 14.6 | 3.6 |
| A12 | 1  | -17.5 | 15.0 | 47.8 | 16.2 | 3.4 |
|     | 2  | -17.3 | 15.4 | 46.1 | 16.0 | 3.4 |
|     | 3  | -17.4 | 14.8 | 46.2 | 16.0 | 3.4 |
|     | 4  | -17.5 | 14.8 | 46.5 | 15.9 | 3.4 |
|     | 5  | -17.7 | 15.0 | 46.7 | 16.0 | 3.4 |
|     | 6  | -17.7 | 15.3 | 47.2 | 16.1 | 3.4 |
|     | 7  | -17.9 | 14.6 | 47.3 | 15.9 | 3.5 |
|     | 8  | -18.5 | 15.1 | 50.3 | 16.3 | 3.6 |

---

-- = missing data



*Supplementary Data*

**Supplemental Table 2.** CIR and NIR of sequential hair segments from Community B ( $n = 6$ )

| Sample ID | Segment (cm) | $\delta^{13}\text{C}$ (%VPDB) | $\delta^{15}\text{N}$ (% AIR) | % C  | % N  | C/N |
|-----------|--------------|-------------------------------|-------------------------------|------|------|-----|
| B1        | 1            | -18.2                         | 10.8                          | 48.7 | 16.7 | 3.4 |
|           | 2            | -18.4                         | 11.5                          | 47.1 | 15.9 | 3.5 |
|           | 3            | -18.4                         | 11.7                          | 47.1 | 15.8 | 3.5 |
|           | 4            | -18.0                         | 11.9                          | 46.7 | 15.8 | 3.5 |
|           | 5            | -18.2                         | 10.8                          | 47.0 | 15.9 | 3.4 |
|           | 6            | -18.3                         | 10.5                          | 46.1 | 15.7 | 3.4 |
| B2        | 1            | -18.7                         | 10.7                          | 46.1 | 15.7 | 3.4 |
|           | 2            | -19.0                         | 10.5                          | 46.0 | 15.5 | 3.5 |
|           | 3            | -18.9                         | 10.7                          | 46.8 | 15.6 | 3.5 |
|           | 4            | -18.7                         | 10.8                          | 46.8 | 15.6 | 3.5 |
|           | 5            | -18.6                         | 10.8                          | 46.7 | 15.6 | 3.5 |
|           | 6            | -18.6                         | 10.7                          | 46.6 | 15.5 | 3.5 |
|           | 7            | -18.6                         | 10.9                          | 46.5 | 15.3 | 3.5 |
|           | 8            | -18.2                         | 11.2                          | 44.6 | 14.6 | 3.6 |
|           | 9            | -18.1                         | 11.2                          | 44.1 | 14.5 | 3.5 |
|           | 10           | -18.3                         | 11.3                          | 44.6 | 14.6 | 3.6 |
|           | 11           | -18.1                         | 11.2                          | 44.7 | 14.7 | 3.5 |
|           | 12           | -18.3                         | 10.9                          | 43.9 | 14.3 | 3.6 |
|           | 13           | -18.2                         | 10.8                          | 45.5 | 14.7 | 3.6 |
| B3        | 1            | -17.7                         | 8.8                           | 41.2 | 13.8 | 3.5 |
|           | 2            | -17.4                         | 8.8                           | 42.0 | 13.9 | 3.5 |
|           | 3            | -17.3                         | 9.0                           | 41.9 | 14.0 | 3.5 |
|           | 4            | -17.0                         | 9.5                           | 41.5 | 13.9 | 3.5 |
|           | 5            | -17.1                         | 9.8                           | 42.5 | 14.1 | 3.5 |

*Supplementary Data*

|    |    |       |      |      |      |     |
|----|----|-------|------|------|------|-----|
|    | 6  | -17.5 | 10.0 | 42.5 | 14.1 | 3.5 |
|    | 7  | -17.3 | 9.0  | 42.5 | 14.1 | 3.5 |
|    | 8  | -17.1 | 9.0  | 42.1 | 14.0 | 3.5 |
|    | 9  | -17.1 | 8.8  | 42.3 | 14.0 | 3.5 |
|    | 10 | -17.3 | 9.2  | 42.4 | 13.8 | 3.6 |
|    | 11 | -17.0 | 8.7  | 42.6 | 14.0 | 3.6 |
|    | 12 | -17.0 | 8.8  | 42.0 | 13.8 | 3.5 |
|    | 13 | -16.9 | 8.8  | 42.4 | 14.0 | 3.5 |
|    | 14 | -16.8 | 9.1  | 42.8 | 14.1 | 3.5 |
|    | 15 | -17.0 | 8.9  | 43.1 | 14.0 | 3.6 |
|    | 16 | -17.1 | 9.1  | 42.4 | 14.0 | 3.5 |
|    | 17 | -17.2 | 9.0  | 41.7 | 13.7 | 3.5 |
|    | 18 | -17.4 | 9.3  | 42.4 | 14.0 | 3.5 |
|    | 19 | -17.4 | 9.3  | 42.0 | 13.9 | 3.5 |
|    | 20 | -17.7 | 9.2  | 41.0 | 13.4 | 3.6 |
|    | 21 | -17.7 | 8.5  | 43.2 | 14.2 | 3.5 |
|    | 22 | -17.7 | 8.3  | 43.2 | 14.2 | 3.6 |
|    | 23 | -17.3 | 8.1  | 42.3 | 13.9 | 3.6 |
| B4 | 1  | -18.5 | 14.9 | 44.4 | 14.8 | 3.5 |
|    | 2  | -18.6 | 15.1 | 42.7 | 14.2 | 3.5 |
|    | 3  | -18.2 | 15.3 | 44.0 | 14.7 | 3.5 |
|    | 4  | -18.5 | 14.4 | 43.7 | 14.6 | 3.5 |
|    | 5  | -18.8 | 13.8 | 46.7 | 15.5 | 3.5 |
|    | 6  | -19.0 | 13.4 | 42.4 | 14.0 | 3.5 |
|    | 7  | -18.8 | 13.6 | 42.5 | 14.0 | 3.5 |
|    | 8  | -18.8 | 13.9 | 43.5 | 14.3 | 3.5 |
|    | 9  | -18.4 | 14.0 | 44.4 | 14.5 | 3.6 |

*Supplementary Data*

|    |    |       |      |      |      |     |
|----|----|-------|------|------|------|-----|
|    | 10 | -18.5 | 13.9 | 44.9 | 14.6 | 3.6 |
|    | 11 | -18.4 | 14.0 | 44.9 | 14.6 | 3.6 |
|    | 12 | -18.4 | 14.3 | 44.5 | 14.5 | 3.6 |
|    | 13 | -18.3 | 14.5 | 44.8 | 14.6 | 3.6 |
| B5 | 1  | -18.1 | 14.6 | 48.0 | 16.0 | 3.5 |
|    | 2  | -17.8 | 14.6 | 47.4 | 16.1 | 3.4 |
|    | 3  | -17.6 | 14.4 | 47.7 | 16.3 | 3.4 |
|    | 4  | -16.6 | 11.2 | 50.3 | 17.0 | 3.4 |
|    | 5  | -17.7 | 14.4 | 47.9 | 16.1 | 3.5 |
|    | 6  | -17.6 | 14.6 | 47.8 | 16.2 | 3.4 |
| B6 | 1  | -18.3 | 11.6 | 45.4 | 15.5 | 3.4 |
|    | 2  | -18.2 | 11.4 | 46.7 | 15.9 | 3.4 |
|    | 3  | -18.3 | 11.9 | 47.0 | 15.8 | 3.5 |
|    | 4  | --    | --   | --   | --   | --  |
|    | 5  | -17.8 | 11.4 | 96.3 | 32.9 | 3.4 |
|    | 6  | -17.8 | 11.2 | 43.3 | 14.6 | 3.5 |
|    | 7  | -18.2 | 11.7 | 47.1 | 15.9 | 3.5 |
|    | 8  | -18.2 | 11.7 | 46.8 | 15.7 | 3.5 |
|    | 9  | -17.5 | 11.5 | 46.1 | 16.3 | 3.3 |
|    | 10 | -18.0 | 11.2 | 46.8 | 15.7 | 3.5 |
|    | 11 | -17.6 | 11.2 | 47.2 | 15.8 | 3.5 |
|    | 12 | -17.9 | 10.9 | 47.1 | 15.7 | 3.5 |

---

-- = missing data
